# Supplementary material for: Synthesis and photocatalytic activities of two homochiral metal–organic frameworks with cages and hydrogen bonding helices
Source: Royal Society of Chemistry journal article supplement (doi:10.1039/d0ce00700e), 2020-01-01
Supplement: d0ce00700e1.pdf [file d0ce00700e1.pdf]

## Supporting Information

### **Synthesis and photocatalytic activities of two homochiral metal-organic frameworks with cages and hydrogen bonding helices**

Zhan-Guo Jiang<sup>#a</sup>, Xin Wu<sup>#bc</sup>, Zhong-Xuan Xu<sup>b</sup>, Cai-Hong Zhan<sup>\*a</sup>, Jian Zhang<sup>\*b</sup>

*<sup>a</sup>College of Chemistry and Life Sciences, Institute of Physical Chemistry, Zhejiang Normal University, Key Laboratory of the Ministry of Education for Advanced Catalysis Material, Jinhua, Zhejiang 321004, P. R. China.*

*<sup>b</sup>State Key Laboratory of Structural Chemistry, Fujian Institute of Research on the Structure of Matter, the Chinese Academy of Sciences, Fuzhou, Fujian 350002, P. R. China.*

*<sup>c</sup>University of Chinese Academy of Sciences, 100049 Beijing, P. R. China*

*\*[chzhan@zjnu.cn](mailto:chzhan@zjnu.cn)*

*\*[zhj@fjirsm.ac.cn](mailto:zhj@fjirsm.ac.cn)*

*# These authors contributed equally to this work.*

## Single crystal X-ray structural analysis

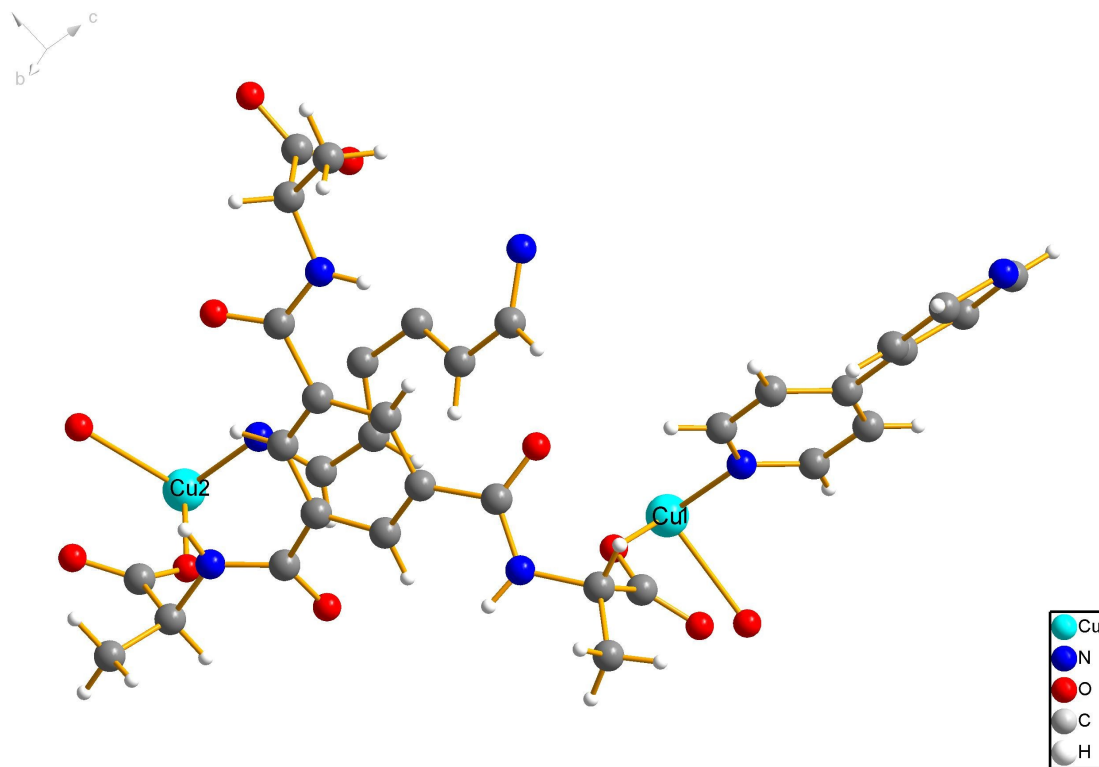

Fig. S1 The asymmetric cell structure of compound **1L**.

## Powder X-ray Diffraction Studies

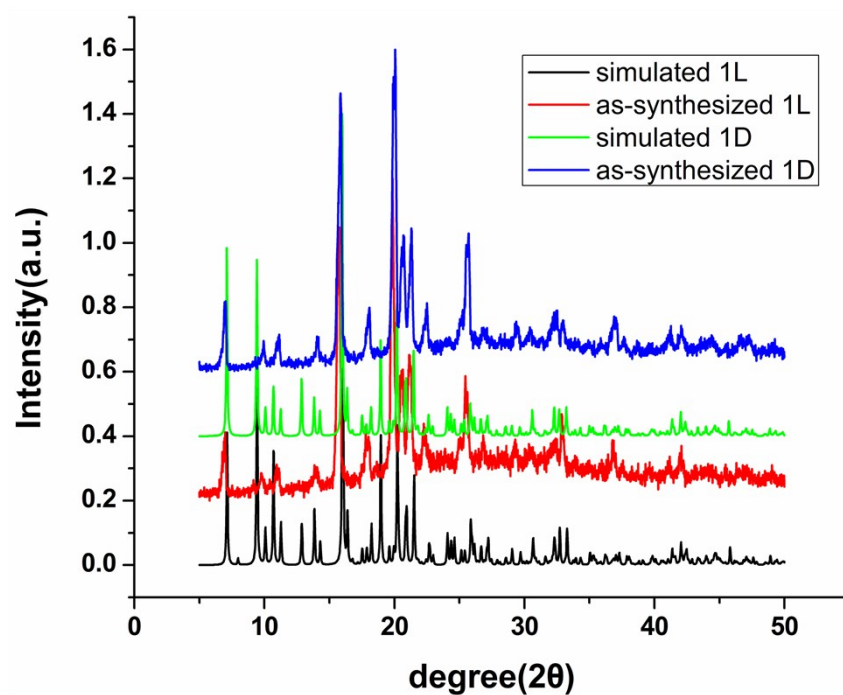

Fig. S2 The PXRD patterns of compound **1L** and **1D**.

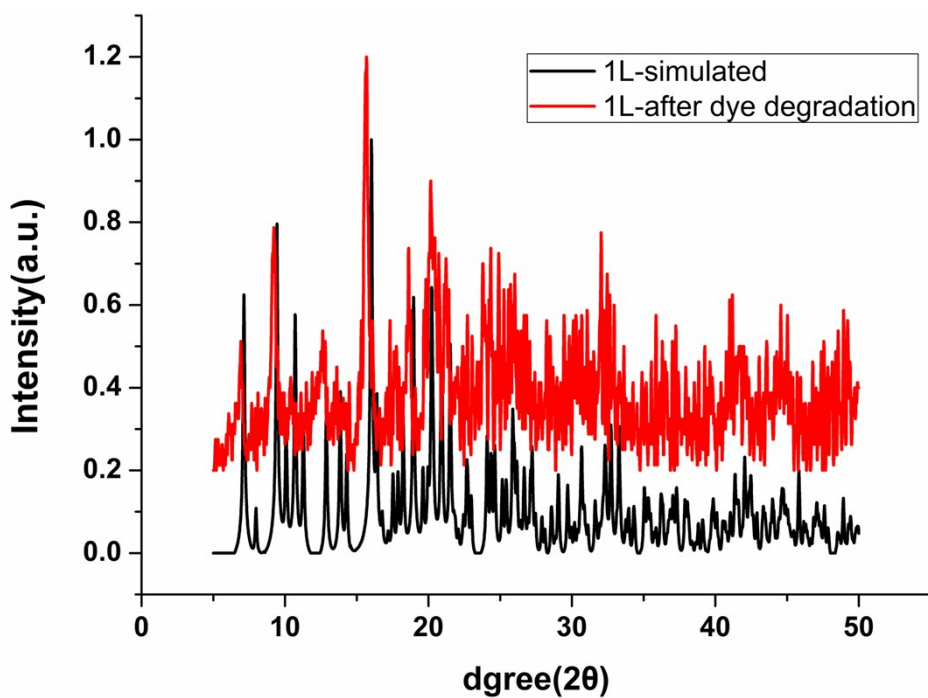

Fig. S3 The PXR D patterns of compound **1L** after dye degradation.

### Thermogravimetric studies

Thermogravimetric analyses (TGA) were performed using a NETSCHZ STA-449C thermoanalyzer with a heating rate of  $10^{\circ}\text{C}/\text{min}$  under a nitrogen atmosphere.

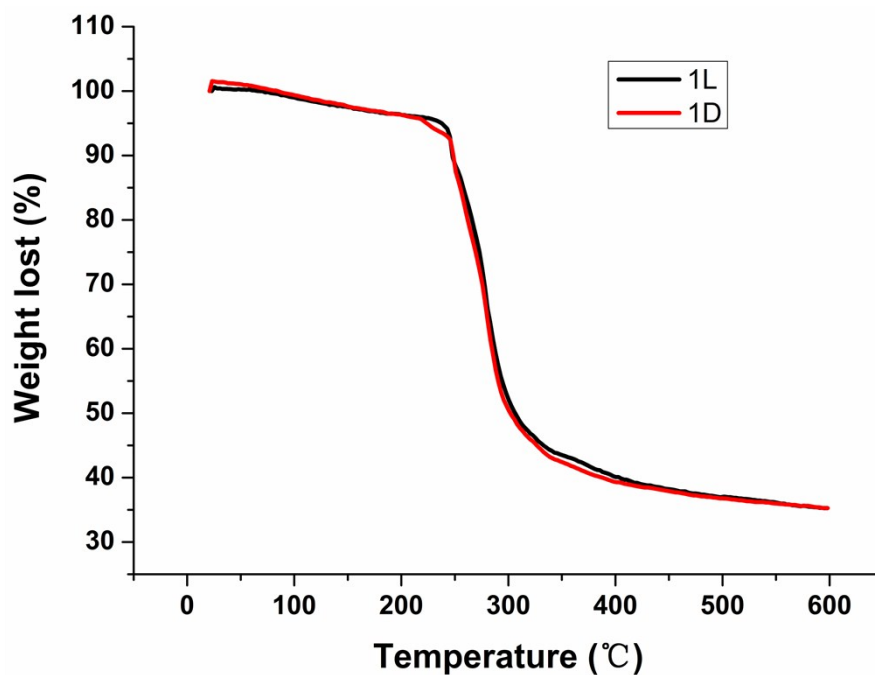

Fig. S4 The TG curves of compound **1L** and **1D**.

## Photocatalytic properties

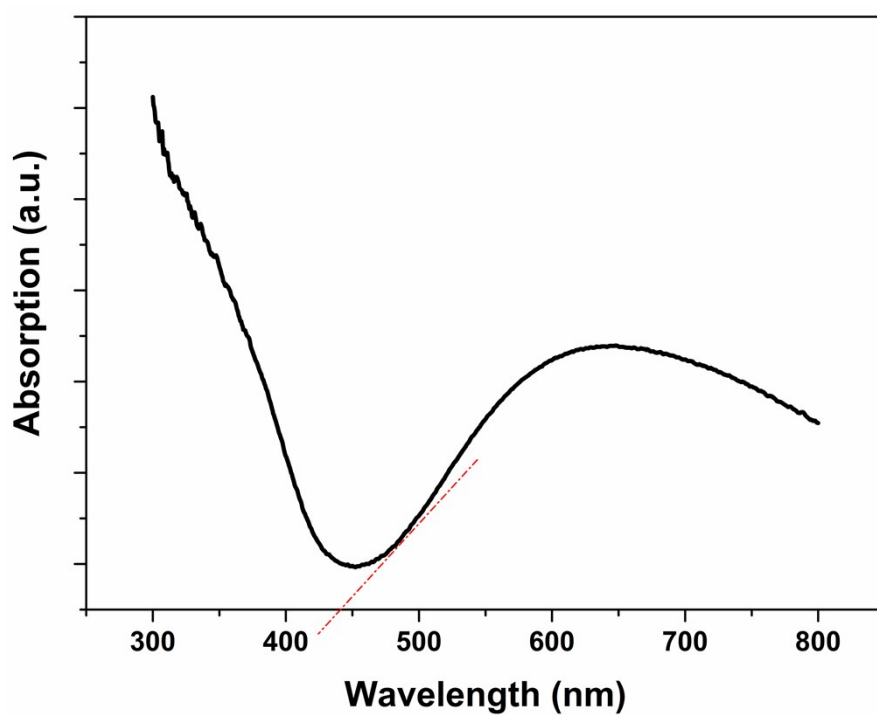

Fig. S5 The solid state UV-Vis reflectance spectrum of compound **1L**.

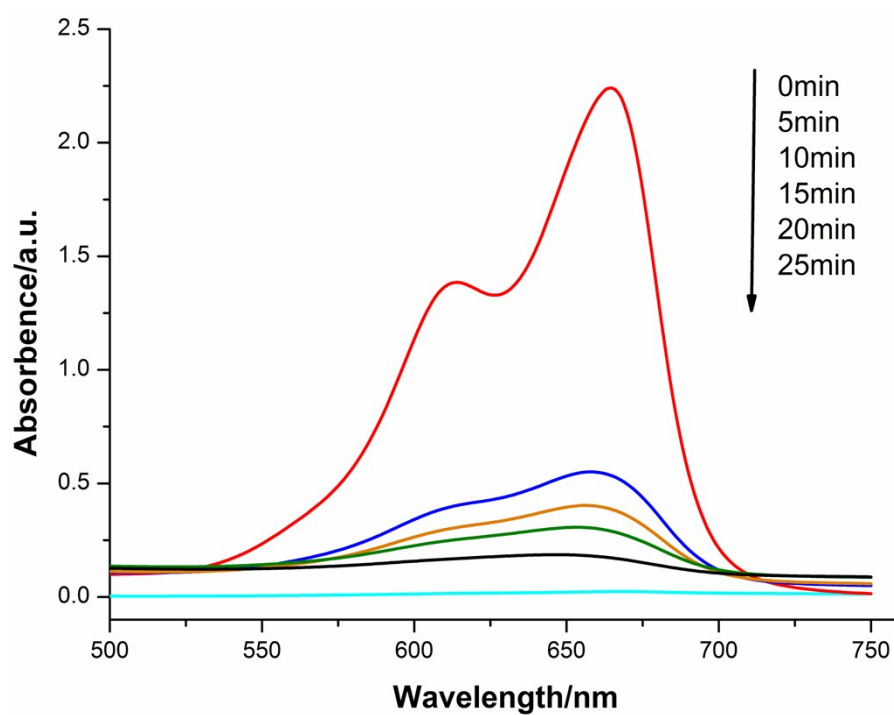

Fig. S6 The temporal UV-Vis absorption spectrum changes of MB aqueous solutions with the photo-degradation catalyzed by **1L** in the presence of  $\text{H}_2\text{O}_2$  additive.

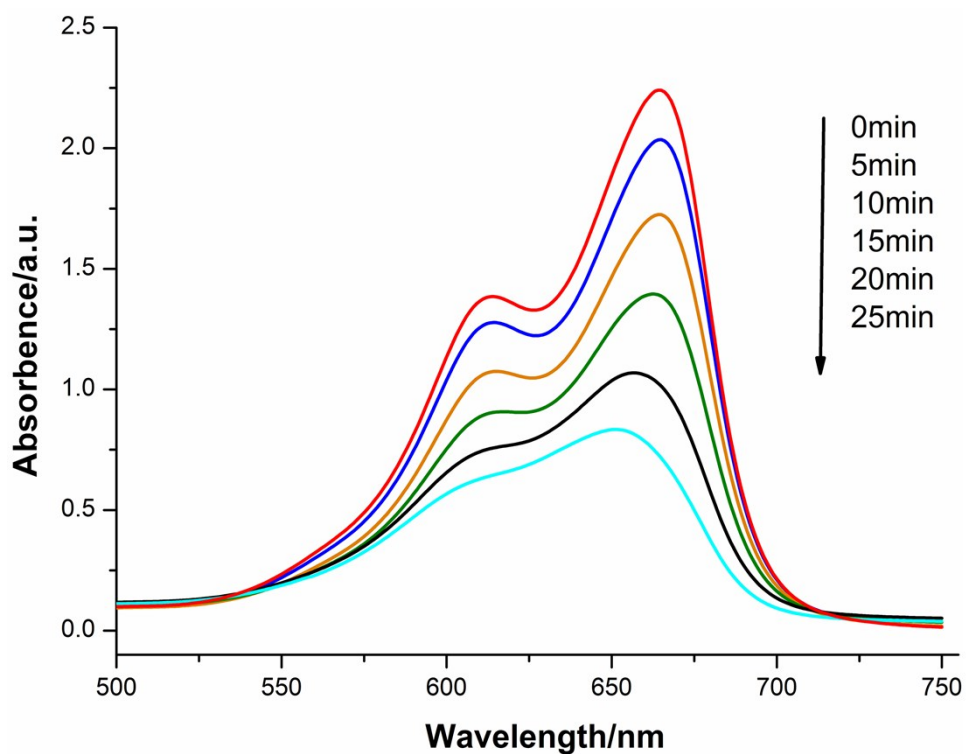

**Fig. S7** The temporal UV-Vis absorption spectrum changes of MB aqueous solutions with the photo-degradation catalyzed by **1L**.

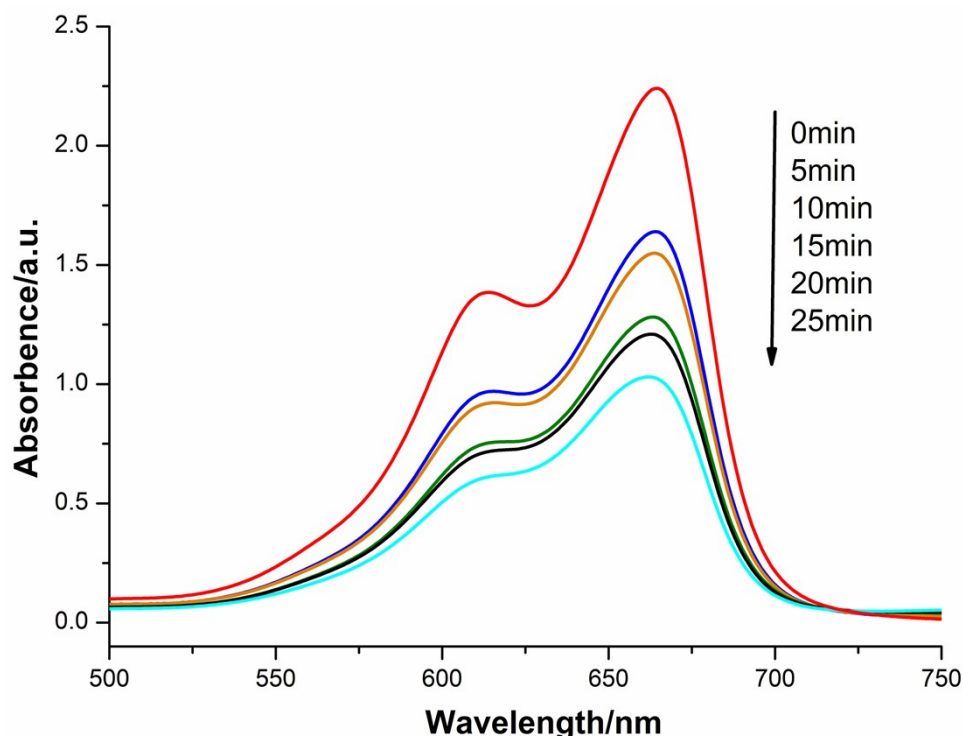

**Fig. S8** The temporal UV-Vis absorption spectrum changes of MB aqueous solutions with the photo-degradation catalyzed by  $\text{H}_2\text{O}_2$ .

At room temperature, 0.0207 g crystal of **1L** was added into 20 mL of  $4.0 \times 10^{-5}$  mol L<sup>-1</sup> methylene blue aqueous solution. Then 0.1 ml H<sub>2</sub>O<sub>2</sub> solution (30%) was added in the solution. Afterwards, the suspensions were stirred in the dark for about 30 min and then exposed to the 500 W xenon arc lamp irradiation with visible light. 2 ml reaction solution was taken every 5 minutes until the solution become colourless. Then the solutions were filtered and analyzed by the UV-Vis spectrophotometry (Lambda35). The photo-degradation reaction of MB aqueous solution catalysed by **1L** and H<sub>2</sub>O<sub>2</sub> respectively was the same as above except that the catalyst is different.
